# Supplementary material for: Epithelial innate immunity mediates tubular cell senescence after kidney injury
Source: JCI journal article supplement (doi:10.1172/jci.insight.125490), 2019-01-23
Supplement: sd1 [file 1]

FA-WT day 2

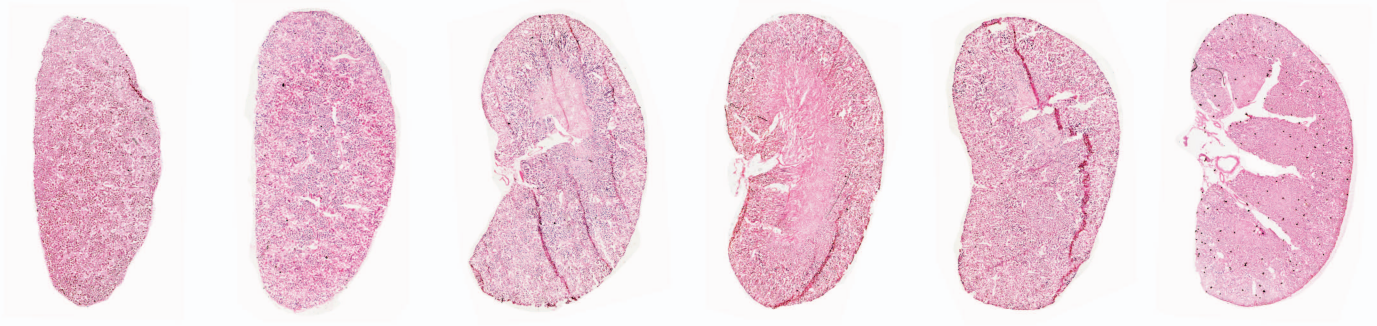

FA-WT day 3

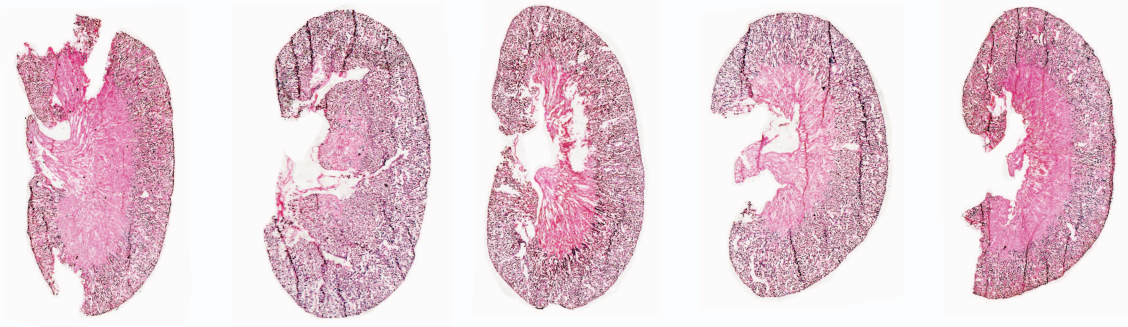

**Supplementary Figure 1. Appearance of LacZ staining of SA-β-Gal activity in WT kidneys 2 and 3 days after FA injury.**

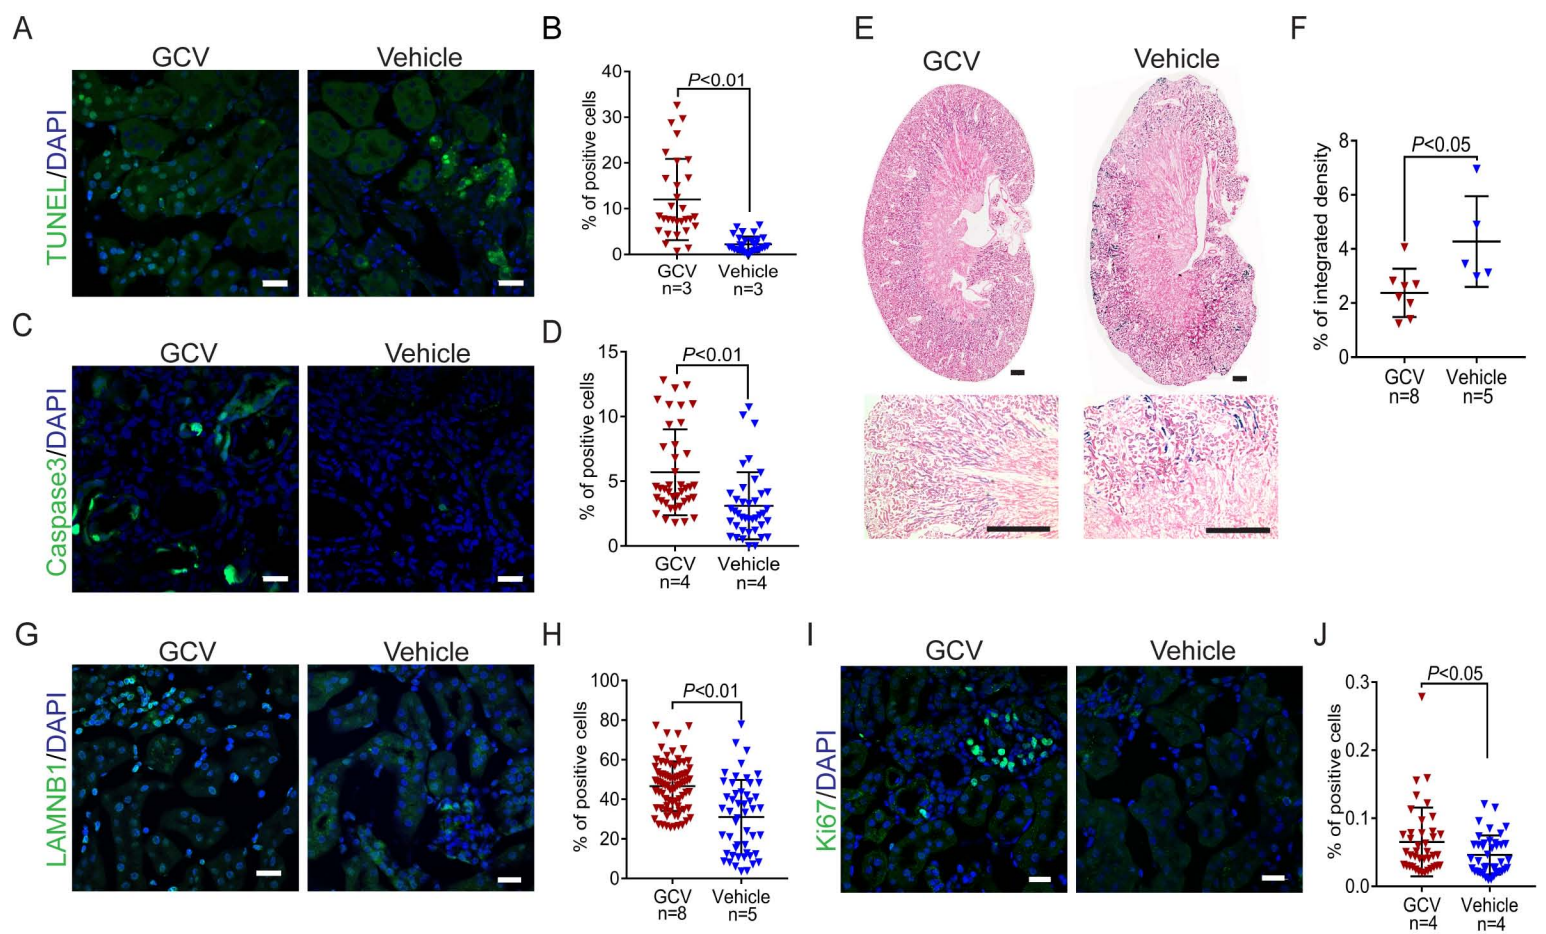

**Supplementary Figure 2. Ganciclovir treatment of p16-3MR mice induces tubular apoptosis and reduces senescence after FA injury.** (A) Representative immunofluorescence confocal images of TUNEL-stained GCV-treated mice kidneys with correspondent digital image analysis quantification (B), and activated caspase 3 (C-D) compared to controls 28 days after FA injury. (E) Representative images of kidneys stained for SA- $\beta$ -Gal activity at low (upper panels) and high (lower panels) magnification of GCV-treated mice compared to vehicle-treated controls 28 days after FA injury, and (F) correspondent quantification by digital image analysis. Scale bars are 500  $\mu$ m in the upper and 200  $\mu$ m in the lower panels. (G) Representative immunofluorescence confocal images of GCV-treated mice kidneys probed with an antibody against LAMNB1 compared to controls 28 days after FA injury, and (H) correspondent quantification. Scale bars are 20  $\mu$ m. (I) Representative immunofluorescence confocal images of GCV-treated mice kidneys probed with an antibody against the proliferation marker Ki67 compared to controls 28 days after FA injury, and (J) correspondent quantification. Data are presented as mean  $\pm$  SD. P values were calculated with two-tailed Student's t-test.



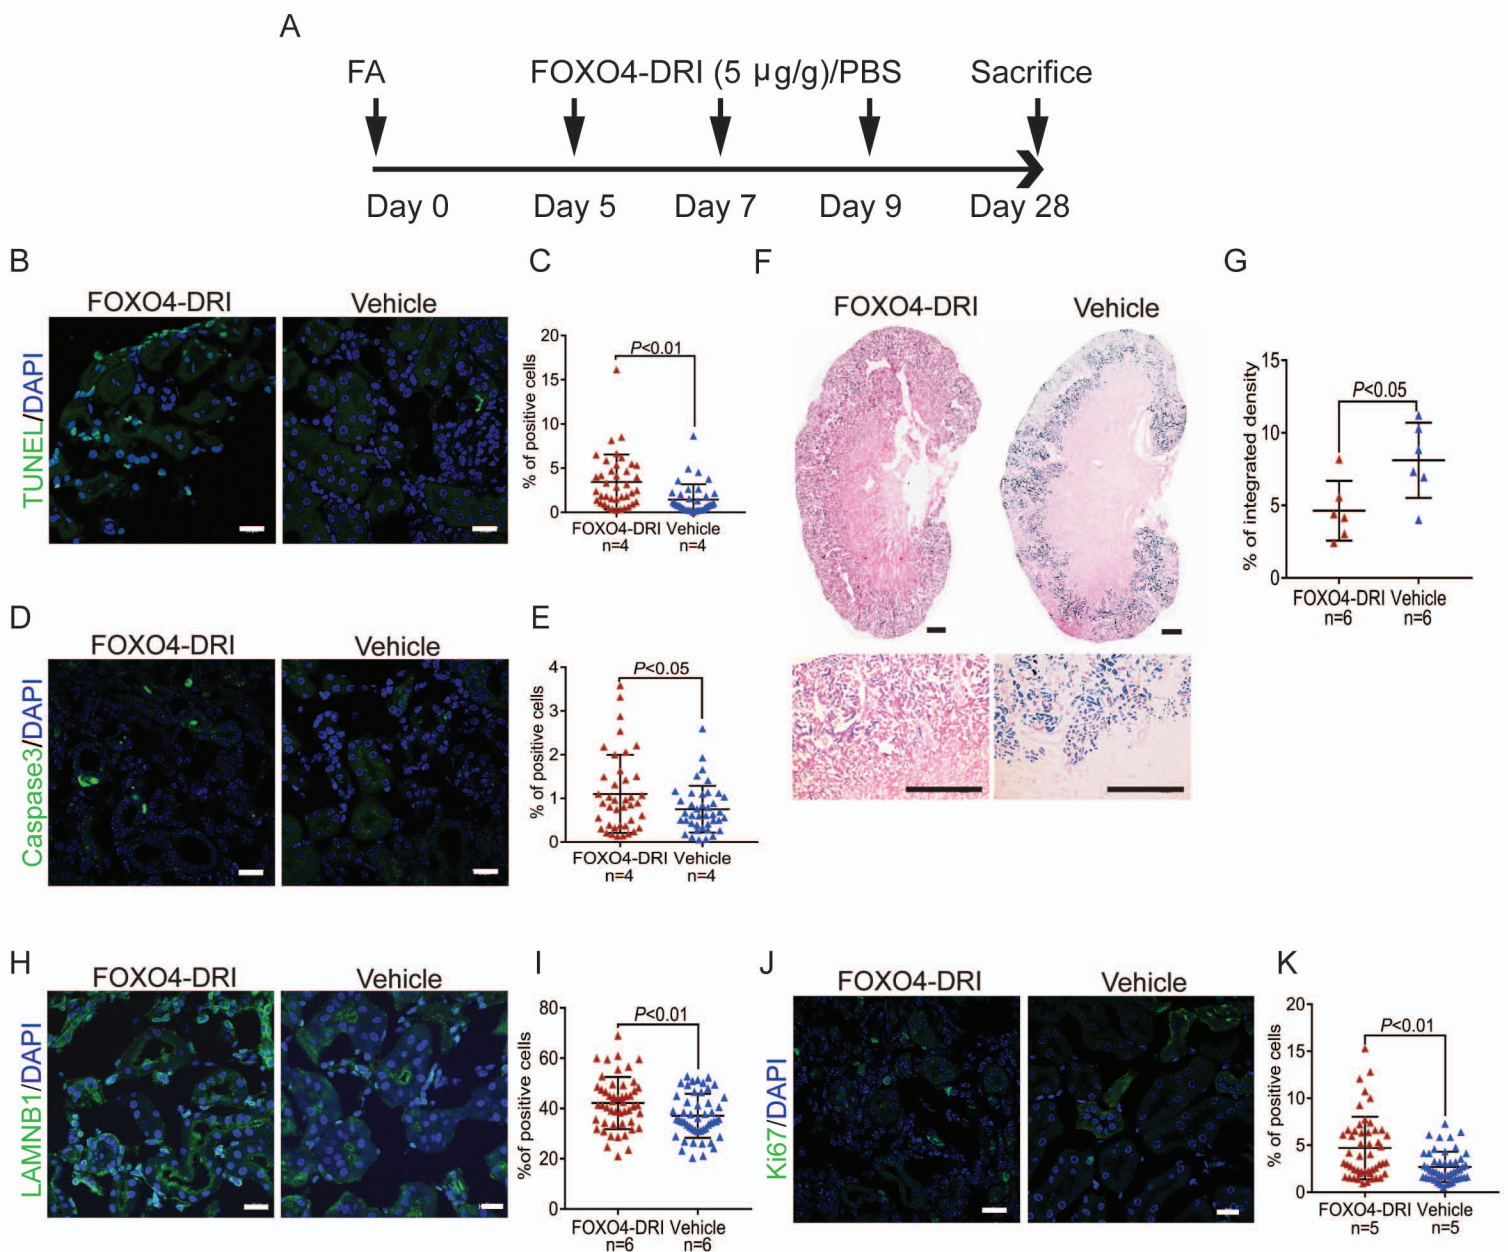

**Supplementary Figure 3. FOXO4-DRI treatment increases tubular apoptosis and reduces kidney senescence after FA injury.** (A) Schematic representation of the protocol for inducing clearance of senescent cells by FOXO4-DRI administration to FA-injured mice. PBS: phosphate-buffered saline. (B) Representative immunofluorescence confocal images of TUNEL-stained FOXO4-DRI-treated mice kidneys with correspondent digital image analysis quantification (C), and activated caspase 3 (D-E) compared to controls 28 days after FA injury. (F) Representative images of kidneys stained for SA-β-Gal activity at low (upper panels) and high (lower panels) magnification of FOXO4-DRI-treated mice compared to vehicle-treated controls 28 days after FA injury, and (G) correspondent quantification by digital image analysis. (H) Representative immunofluorescence confocal images of FOXO4-DRI-treated mice kidneys probed with an antibody against LAMNB1 compared to controls 28 days after FA injury, and (I) correspondent quantification. Scale bars are 20 µm. (J) Representative immunofluorescence confocal images of FOXO4-DRI-treated mice kidneys probed with an antibody against the proliferation marker Ki67 compared to controls 28 days after FA injury, and (K) correspondent quantification. Data are presented as mean ± SD. P values were calculated with two-tailed Student's t-test.



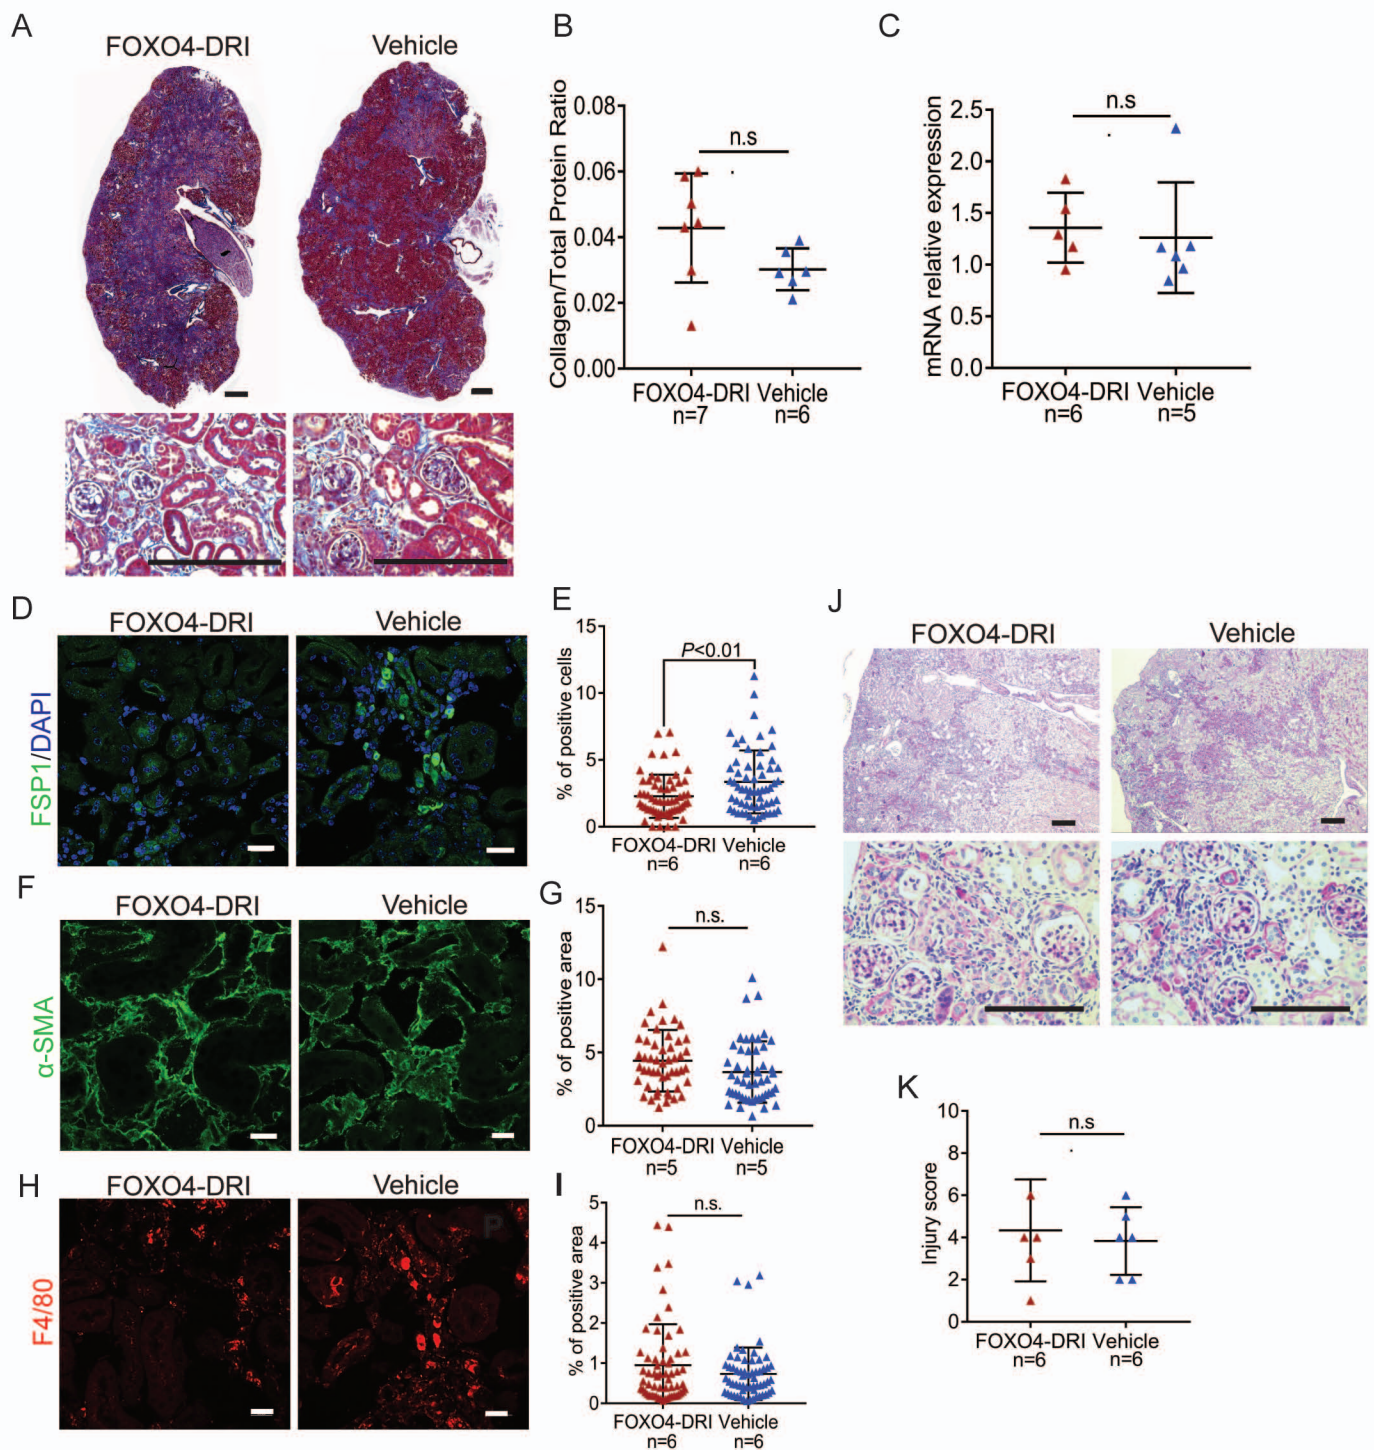

**Supplementary Figure 4. FOXO4-DRI treatment does not affect kidney damage and fibrosis after FA injury.**

(A) Representative images of trichrome-stained kidneys at low (upper panels) and high (lower panels) magnification of FOXO4-DRI-treated mice compared to controls 28 days after FA injury. Scale bars are 500  $\mu$ m in the upper and 200  $\mu$ m in the lower panels. (B) Collagen/total protein content ratios and (C) real-time quantitative PCR of the Collagen 1 mRNA levels in kidney cortices of FOXO4-DRI-treated and vehicle-treated mice 28 days after FA injury. (D) Representative immunofluorescence confocal images of FOXO4-DRI-treated mice kidneys immunostained for the fibroblast marker FSP1 compared to controls 28 days after FA injury, and (E) correspondent quantification by digital image analysis. Scale bars are 20  $\mu$ m. (F) Representative immunofluorescence confocal images of FOXO4-DRI-treated mice kidneys immunostained for the myofibroblast marker  $\alpha$ -SMA compared to controls 28 days after FA injury, and (G) correspondent quantification by digital image analysis. Scale bars are 20  $\mu$ m. (H) Representative immunofluorescence confocal images of FOXO4-DRI-treated mice kidneys immunostained for the macrophage marker F4/80 compared to controls 28 days after FA injury, and (I) correspondent quantification by digital image analysis. Scale bars are 20  $\mu$ m. (J) Representative images of PAS-stained kidneys at low (upper panels) and high (lower panels) magnification of FOXO4-DRI-treated mice compared to controls 28 days after FA injury. Scale bars are 500  $\mu$ m in the upper and 200  $\mu$ m in the lower panels. (K) Tubular injury scores of FOXO4-DRI-treated mice compared to controls 28 days after FA injury. Experimental numbers are reported in each panel. Data are presented as mean  $\pm$  SD. P values were calculated with two-tailed Student's t-test.

**Supplementary Figure 1. Appearance of LacZ staining of SA- $\beta$ -Gal activity in WT kidneys 2 and 3 days after FA injury.**

**Supplementary Figure 2. Ganciclovir treatment of p16-3MR mice leads to an increase in apoptosis of TECs and reduced senescence after FA injury.** (A) Representative immunofluorescence confocal images of TUNEL-stained GCV-treated mice kidneys with correspondent digital image analysis quantification (B), and activated caspase 3 (C-D) compared to controls 28 days after FA injury. (E) Representative images of kidneys stained for SA- $\beta$ -Gal activity at low (upper panels) and high (lower panels) magnification of GCV-treated mice compared to vehicle-treated controls 28 days after FA injury, and (F) correspondent quantification by digital image analysis. Scale bars are 500  $\mu$ m in the upper and 200  $\mu$ m in the lower panels. (G) Representative immunofluorescence confocal images of GCV-treated mice kidneys probed with an antibody against LAMNB1 compared to controls 28 days after FA injury, and (H) correspondent quantification. Scale bars are 20  $\mu$ m. (I) Representative immunofluorescence confocal images of GCV-treated mice kidneys probed with an antibody against the proliferation marker Ki67 compared to controls 28 days after FA injury, and (J) correspondent quantification. Data are presented as mean  $\pm$  SD. P values were calculated with two-tailed Student's t-test.

**Supplementary Figure 3. FOXO4-DRI treatment increases tubular apoptosis and reduces kidney senescence after FA injury.** (A) Schematic representation of the

protocol for inducing clearance of senescent cells by FOXO4-DRI administration to FA-injured mice. PBS: phosphate-buffered saline. **(B)** Representative immunofluorescence confocal images of TUNEL-stained FOXO4-DRI-treated mice kidneys with correspondent quantification **(C)**, and activated caspase 3 **(D-E)** compared to controls 28 days after FA injury. **(F)** Representative images of kidneys stained for SA- $\beta$ -Gal activity at low (upper panels) and high (lower panels) magnification of FOXO4-DRI-treated mice compared to vehicle-treated controls 28 days after FA injury, and **(G)** correspondent quantification by digital image analysis. **(H)** Representative immunofluorescence confocal images of FOXO4-DRI-treated mice kidneys probed with an antibody against LAMNB1 compared to controls 28 days after FA injury, and **(I)** correspondent quantification. Scale bars are 20  $\mu$ m. **(J)** Representative immunofluorescence confocal images of FOXO4-DRI-treated mice kidneys probed with an antibody against the proliferation marker Ki67 compared to controls 28 days after FA injury and **(K)** correspondent quantification. Data are presented as mean  $\pm$  SD. P values were calculated with two-tailed Student's t-test.

**Supplementary Figure 4. FOXO4-DRI treatment does not affect kidney damage and fibrosis after FA injury.** **(A)** Representative images of trichrome-stained kidneys at low (upper panels) and high (lower panels) magnification of FOXO4-DRI-treated mice compared to controls 28 days after FA injury. Scale bars are 500  $\mu$ m in the upper and 200  $\mu$ m in the lower panels. **(B)** Collagen/total protein content ratios and **(C)** real-time quantitative PCR of the Collagen 1 mRNA levels in kidney cortexes of FOXO4-DRI-treated and vehicle-treated mice 28 days after FA injury. **(D)** Representative

immunofluorescence confocal images of FOXO4-DRI-treated mice kidneys immunostained for the fibroblast marker FSP1 compared to controls 28 days after FA injury, and (E) correspondent quantification. Scale bars are 20  $\mu$ m. (F) Representative immunofluorescence confocal images of FOXO4-DRI-treated mice kidneys immunostained for the myofibroblast marker  $\alpha$ -SMA compared to controls 28 days after FA injury, and (G) correspondent quantification by digital image analysis. Scale bars are 20  $\mu$ m. (H) Representative immunofluorescence confocal images of FOXO4-DRI-treated mice kidneys immunostained for the macrophage marker F4/80 compared to controls 28 days after FA injury, and (I) correspondent quantification by digital image analysis. Scale bars are 20  $\mu$ m. (J) Representative images of PAS-stained kidneys at low (upper panels) and high (lower panels) magnification of FOXO4-DRI-treated mice compared to controls 28 days after FA injury. Scale bars are 500  $\mu$ m in the upper and 200  $\mu$ m in the lower panels. (K) Tubular injury scores of FOXO4-DRI-treated mice compared to controls 28 days after FA injury. Experimental numbers are reported in each panel. Data are presented as mean  $\pm$  SD. P values were calculated with two-tailed Student's t-test.

**Supplementary Table 1. Primer pairs used in the study.**

| Primers       | Forward                | Reverse                |
|---------------|------------------------|------------------------|
| Actin         | GTACCACCATGTACCCAGGC   | AACGCAGCTCAGTAACAGTC   |
| IL-1 $\alpha$ | CGAAGACTACAGTTCTGCCATT | GACGTTTCAGAGGTTCTCAGAG |

|               |                           |                          |
|---------------|---------------------------|--------------------------|
| IL-1 $\beta$  | GCAACTGTTCTGAACTCAACT     | ATCTTTTGGGGTCCGTCAACT    |
| IL-6          | GAGGATACCACTCCCAACAGACC   | AAGTGCATCATCGTTGTTCATACA |
| TNF- $\alpha$ | GCCTCTTCTCATTCTGCTTG      | CTGATGAGAGGGAGGCCATT     |
| MCP-1         | TTAAAAACCTGGATCGGAACCAA   | GCATTAGCTTCAGATTTACGGGT  |
| Collagen1     | CCTGGTAAAGATGGTGCC        | CACCAGGTTACCTTTTCGCACC   |
| Ihh           | CTACAATCCCGACATCATCTTCAAG | CAGAGATGGCCAGTGAGTTCAGA  |
| Shh           | AAAGCTGACCCCTTTAGCCTA     | TTCGGAGTTTCTTGTGATCTTCC  |

---
